# Supplementary material
Source: PubMed Central journal article supplement (PMC2965545)
Supplement: supp_tpc.110.074815_Amzel_Supplemental_Data_final.pdf [file supp_tpc.110.074815_Amzel_Supplemental_Data_final.pdf]

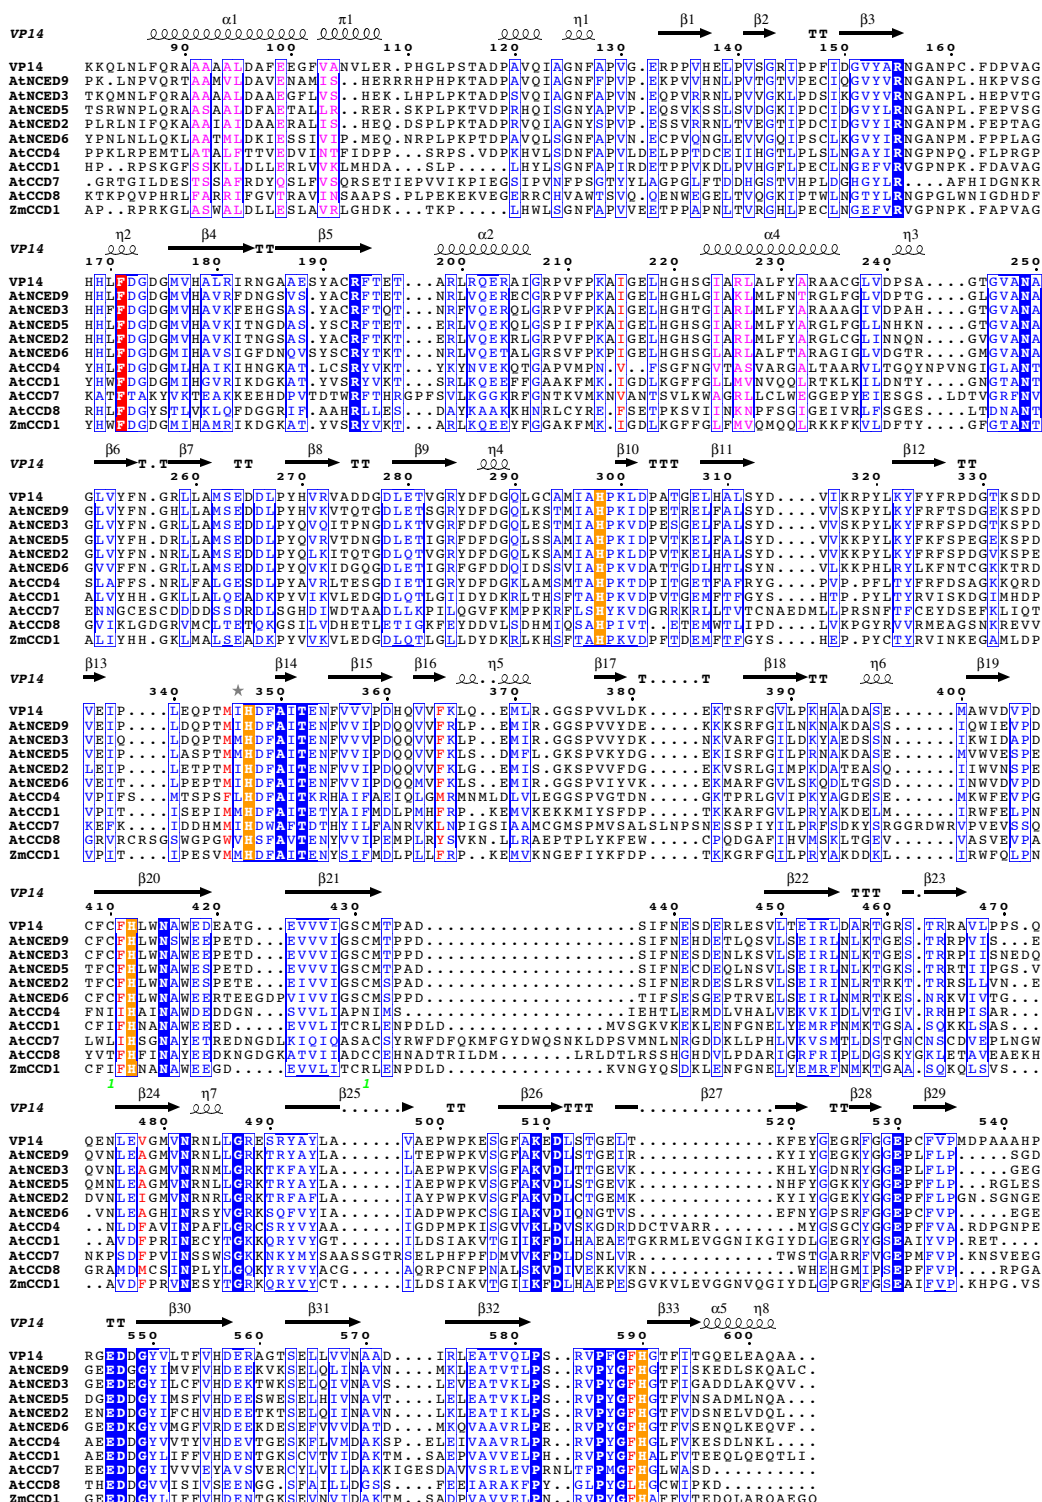

Supplemental Figure 1. Sequence alignment of VP14 with CCDs from *Arabidopsis thaliana* and *Zm* CCD1. Blue background shows sequence identity, and purple background shows identity in the α1 and α3 helices. Blue letters show similarity, and purple letters show similarity in the α1 and α3 helices. Orange background shows identity for the histidines coordinating the catalytic iron. Red indicated residues that were mutated. The alignment was done with ClustalW and the figure with ESPrpt (Gouet et al., 1999). Accession numbers are: *Zea mays* (*Zm*) VP14 (AAB62181.2) and CCD1 (AAZ22349.1), *Arabidopsis thaliana* (*At*) NCED9 (NP\_177960.1), NCED3 (NP\_188062.1), NCED5 (NP\_174302.1), NCED2 (NP\_193569.1), NCED6 (NP\_189064.1), NCED4 (NP\_193652.1), CCD1 (NP\_191911.1), CCD7 (NP\_182026.1), and CCD8 (NP\_195007.2).
